# Supplementary material for: Chinese Consensus Report on Family-BasedHelicobacter pyloriInfection Control and Management (2021 Edition)
Source: HighWire-hosted journal article supplement (doi:10.1136/gutjnl-2021-325630), 2021-11-26
Supplement: gutjnl-2021-325630supp002_data_supplement.pdf [file gutjnl-2021-325630supp002_data_supplement.pdf]

1 **Supplementary table 1**2 Seven original clinical questions and statements that failed to reach consensus and was removed from  
3 the final report

4

| Clinical Questions                                                                                                                                                                                     | Statements                                                                                                                                                                                                                                                    | Reasons                                          |
|--------------------------------------------------------------------------------------------------------------------------------------------------------------------------------------------------------|---------------------------------------------------------------------------------------------------------------------------------------------------------------------------------------------------------------------------------------------------------------|--------------------------------------------------|
| CQ6. Epidemiologically, what is the major genotype of <i>H. pylori</i> strains in <i>H. pylori</i> -infected patients in China's household?                                                            | Statement 6. Epidemiologically, <i>H. pylori</i> strains that carry <i>cagA</i> and <i>vacA</i> gene are major genotype strains in <i>H. pylori</i> -infected patients in China's household.                                                                  | Important, but need more evidence                |
| CQ7. Do different genotypes of <i>H. pylori</i> strain have same effects in causing inflammation and diseases in <i>H. pylori</i> -infected patients?                                                  | Statement 7. <i>H. pylori</i> strains that carry <i>cagA</i> and <i>vacA</i> gene cause severer inflammation and diseases than the <i>cagA</i> -, <i>vacA</i> -negative strains in <i>H. pylori</i> -infected patients.                                       | Important, but need more evidence                |
| CQ8. Do different genotypes of <i>H. pylori</i> strain exert same effects in causing gastric precancerous lesions and gastric cancer in <i>H. pylori</i> -infected patients in China?                  | Statement 8. <i>H. pylori</i> strains that carry <i>cagA</i> and <i>vacA</i> gene are the major genotype of bacteria strains that cause gastric precancerous lesions and gastric cancer in China                                                              | Important, but need more evidence                |
| CQ13. Is <i>H. pylori</i> re-infection or recurrence common after eradication in <i>H. pylori</i> -infected family members?                                                                            | Statement 13. One critical issue after <i>H. pylori</i> eradication is the re-infection or recurrence within the family unit                                                                                                                                  | Important, but need more investigation           |
| CQ15. Should <i>H. pylori</i> be tested and regular endoscopy surveillance performed in patient with atrophic gastritis and intestinal metaplasia within the family unit?                              | Statement 15. In patient with chronic atrophic gastritis and intestinal metaplasia, <i>H. pylori</i> infection status should be tested and endoscopy surveillance performed on a regular basis within the family unit.                                        | Redundancy, message overlap with other statement |
| CQ19. Is antibiotic resistance a common problem in <i>H. pylori</i> -infected family members within the household?                                                                                     | Statement 19. Antibiotic resistance in <i>H. pylori</i> infected-family members is a critical issue to which clinician and family doctors should pay close attention.                                                                                         | Important, but need more evidence                |
| CQ22. Should the comprehensive family-based <i>H. pylori</i> infection control and management strategy be strengthened for publicity and education to alert family members for the possible infection? | Statement 22. At public and community level, the comprehensive family-based <i>H. pylori</i> infection control and management strategy should be strengthened for publicity and education, and avoid unnecessary waste of medical resources at the same time. | Redundancy, message overlap with other statement |

5
